# Supplementary material
Source: publisher figshare collection journal article supplement (https://geolsoc.figshare.com/ndownloader/files/23204885)
Supplement: Supplementary file 1 [file 23204885]

## Sheet: Table S6
Table S6. Mineralogical and geochemical characteristics of K-bentonites from Songmutang section and other regions
Location	Name	Number of analyses	Age	Clay mineralogy	SiO2(%)	Al2O3(%)	TiO2(%)	Fe2O3T(%)	K2O(%)	Na2O(%)	Reference
Yiyang China	Songmutang	10	Lower Silurian	I	47.936	26.462	0.83	4.345	6.322	0.523	This Study
North America	Deicke(25)	25	Middle Ordovician	I/S	na	na	0.41	2.2	11	0.03	Kolata et al. (1987)
North America	Millbrig(24)	24	Middle Ordovician	I/S	na	na	0.49	1.4	9.4	0.04
Baltoscandia	Kinnekulle(147)	147	Ordovician-Silurian	I/S	54.72	21.75	0.51	2.98	5.77	0.28	Kiipli et al. (2014)
Baltica	Osmundsberg	11	Lower Silurian	I/S	54.35	17.65	0.64	5.96	4.4	0.5	Huff et al. (1997)
America	Appalachian	3	Lower Silurian	I/S	61.17	21.73	1.2	3.69	3.57	0.27	Bergström et al. (1998)
British	South Uplands	20	Silurian	I/S(+Ch)	51.5	25.41	0.91	5.51	7.01	0.73	Huff et al. (1991)
Austria	Cello	9	Upper Ordovician-Middle Silurian	I/S	44.05	14.4	0.64	13.85	3.52	0.66	Histon et al. (2007)
Ukraine	Podolia	4	Silurian	I/S	63.98	25.48	0.3	2.6	9.76	0.04	Huff et al. (2000)
South America	Famatina	4	Upper Ordovician	I/S	59.55	23.93	0.18	1.68	6.88	0.52	Astini et al. (2007)
Argentine	Precordillera	10	Ordovician	I/S	53.47	23.28	0.46	3.51	3.07	0.93	Huff et al. (1998)
Yichang China	wangjiawan	4	Upper Ordovician-Lower Silurian	I	52.13	17.81	0.62	9.85	3.53	1.28	Hu et al. (2009)
Yichang China	huanghuachang	3	Upper Ordovician-Lower Silurian	I/S(+I)	65.33	15.41	0.63	6.32	3.07	0.87
Huzhou China	Anji	6	Upper Ordovician	I/S(+I)	52.21	25.66	1	3	8.14	0.15	Wang et al. (2015)
Nanjing China	Lunshan	16	Upper Ordovician-Lower Silurian	I/S(+I)	49.86	26.5	1.05	3.95	7.44	0.37	Yang et al. (2019)
Enshi China	Mayangzhai	2	Upper Ordovician-Lower Silurian	na	59.77	19.59	0.51	7.21	4.95	0.42	Luo et al. (2017b)
Shiyan China	Yanzixiang	7	Upper Ordovician-Lower Silurian	I	54.97	26.29	0.32	1.65	5.53	0.74	Xiong et al. (2019)
Chongqing China	Liziping	6	Upper Ordovician-Lower Silurian	I	41.05	20.28	2.23	15.39	4.67	1.49
Chongqing China	Fenghuang	3	Upper Ordovician-Lower Silurian	I/S(+I)	54.99	21.41	1.01	7.43	5.54	0.15	Ge et al. (2019)
Zhenba China	Liangbai	1	Upper Ordovician-Lower Silurian	I/S(+I)5	53.18	16.08	0.88	13.2	5.46	0.03
Daozhen China	Tianjiawan	3	Upper Ordovician-Lower Silurian	I/S	48.69	24.76	3.81	3.52	6.29	1.02
Zhenba China	Wuxing	6	Upper Ordovician-Lower Silurian	I/S(+I)	53.23	23.76	0.94	4.45	6.01	<0.03
XishuiChina	Liangcun	1	Upper Ordovician-Lower Silurian	I/S(+I)	44.45	21.56	1.01	11.07	6.21	0.14
Chongqing China	Huangyingxiang	1	Upper Ordovician-Lower Silurian	I/S	49.88	26.16	2.26	3.42	6.89	0.29
I, illite; S,smectite; Ch, chlorite; na,Unprovided data.
